# Supplementary material for: Theranostic unimolecular micelles of highly fluorescent conjugated polymer bottlebrushes for far red/near infrared bioimaging and efficient anticancer drug delivery
Source: Royal Society of Chemistry journal article supplement (doi:10.1039/c6py01838f), 2016-01-01
Supplement: c6py01838f1.pdf [file c6py01838f1.pdf]

## Supporting Information

# Theranostic Unimolecular Micelles of Highly Fluorescent Conjugated Polymer Bottlebrushes for Far Red/Near Infrared Bioimaging and Efficient Anticancer Drug Delivery

*Cangjie Yang,<sup>a</sup> Shuo Huang,<sup>a</sup> Xiaochen Wang,<sup>a, b</sup> Mingfeng Wang<sup>\*,†</sup>*

<sup>a</sup> School of Chemical and Biomedical Engineering, Nanyang Technological University, 62

Nanyang Drive, Singapore 637459

<sup>b</sup> Present address: National Center for Nano Science and Technology, No. 11, Zhongguancun

Beiyitiao, Beijing 100190, China

**Table S1** Experimental details for synthesis of polymer brushes PFTB-*b*-POEGMA and PFTB-*g*-(PCL-*b*-POEGMA) via ATRP

| Polymer bottlebrushes                                                                                | Macroinitiator                                                        | [monomer]/<br>[initiator] | [monomer]<br>[M] | Toluene<br>/mL | [initiator]/<br>[CuBr]/<br>[PMDETA] |
|------------------------------------------------------------------------------------------------------|-----------------------------------------------------------------------|---------------------------|------------------|----------------|-------------------------------------|
| (PFTB- <i>g</i> -(POEGMA <sub>6</sub> ) <sub>2</sub> ) <sub>10</sub>                                 | PFTB <sub>10</sub> -Br                                                | 100:1                     | 0.5              | 4              | 1:1:1                               |
| (PFTB- <i>g</i> -(PCL <sub>8</sub> - <i>b</i> -POEGMA <sub>16</sub> ) <sub>2</sub> ) <sub>10</sub>   | (PFTB- <i>g</i> -(PCL <sub>8</sub> -Br) <sub>2</sub> ) <sub>10</sub>  | 100:1                     | 0.5              | 4              | 1:1:1                               |
| (PFTB- <i>g</i> -(PCL <sub>35</sub> - <i>b</i> -POEGMA <sub>29</sub> ) <sub>2</sub> ) <sub>10</sub>  | (PFTB- <i>g</i> -(PCL <sub>35</sub> -Br) <sub>2</sub> ) <sub>10</sub> | 100:1                     | 0.4              | 4.5            | 1:1:1                               |
| (PFTB- <i>g</i> -(PCL <sub>35</sub> - <i>b</i> -POEGMA <sub>118</sub> ) <sub>2</sub> ) <sub>10</sub> | (PFTB- <i>g</i> -(PCL <sub>35</sub> -Br) <sub>2</sub> ) <sub>10</sub> | 200:1                     | 0.4              | 3              | 1:1:1                               |
| (PFTB- <i>g</i> -(PCL <sub>59</sub> - <i>b</i> -POEGMA <sub>36</sub> ) <sub>2</sub> ) <sub>10</sub>  | (PFTB- <i>g</i> -(PCL <sub>59</sub> -Br) <sub>2</sub> ) <sub>10</sub> | 150:1                     | 0.15             | 20             | 1:1:1                               |

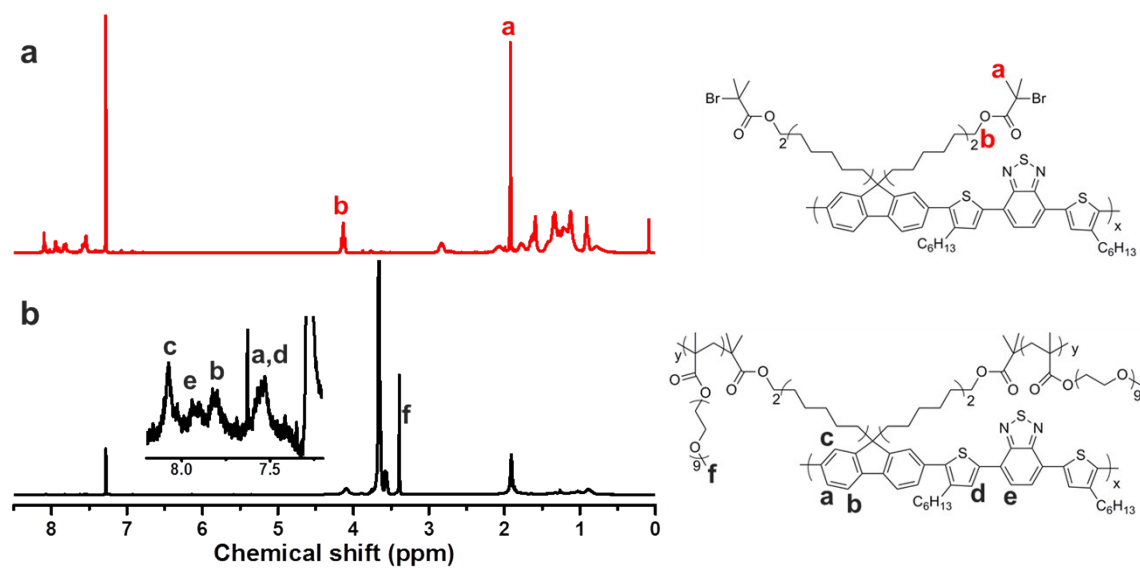

**Figure S1**  $^1\text{H}$  NMR ( $\text{CDCl}_3$ , 300 MHz) spectra of PFTB<sub>10</sub>-Br (a), (PFTB-*g*-(POEGMA<sub>27</sub>)<sub>2</sub>)<sub>10</sub> (b).

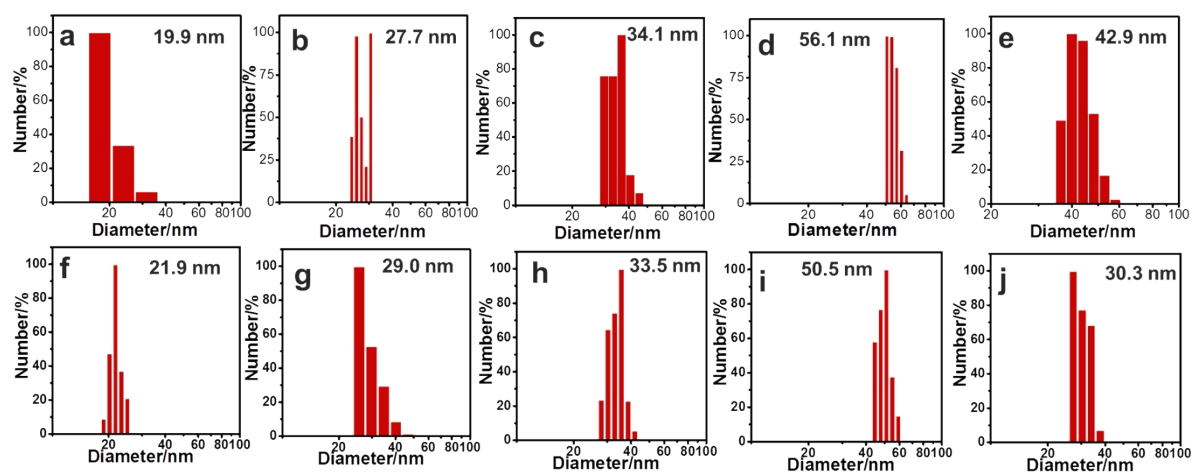

**Figure S2** DLS histograms of UMs formed in THF: (a) UM-P0, (b) UM-P1, (c) UM-P2, (d) UM-P3, (e) UM-P4; and UMs in aqueous medium after being stored at 5 °C for over three months: (f) UM-P0, (g) UM-P1, (h) UM-P2, (i) UM-P3, (j) UM-P4.

**Table S2** Comparison of hydrodynamic diameters between unimolecular micelles in water and THF from DLS results

| <b>D<sub>h</sub> (nm)</b> | <b>P0</b> | <b>P1</b> | <b>P2</b> | <b>P3</b> | <b>P4</b> |
|---------------------------|-----------|-----------|-----------|-----------|-----------|
| <b>Water</b>              | 20.2      | 26.8      | 30.6      | 54.2      | 32.3      |
| <b>THF</b>                | 19.9      | 27.7      | 34.1      | 56.1      | 42.9      |

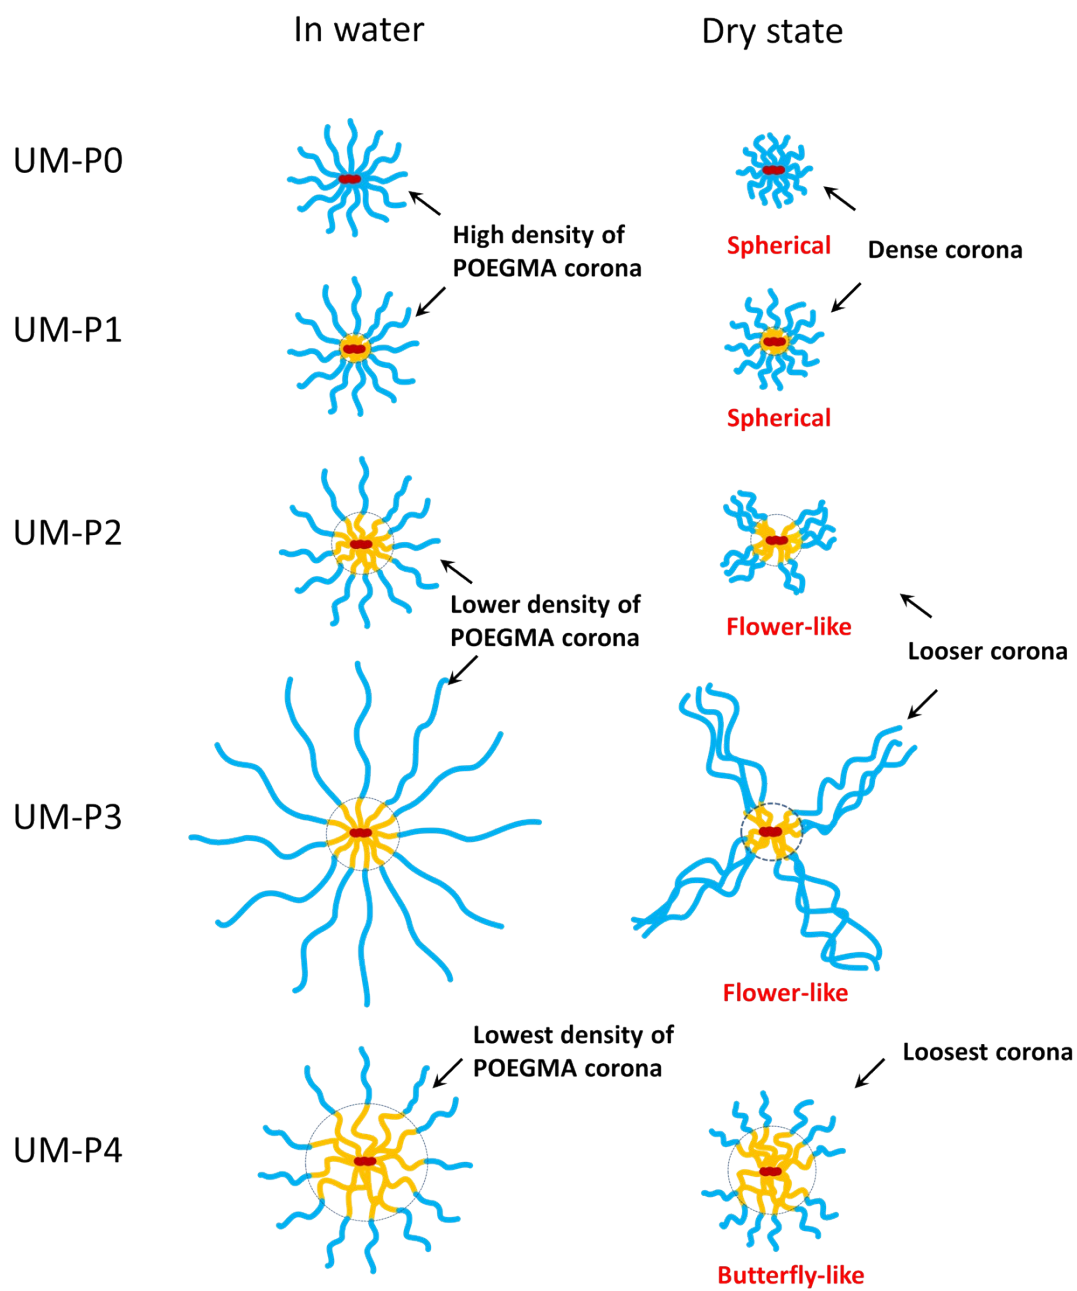

**Figure S3.** Schematic presentation of the morphological transition of UMs from aqueous solution to solid states.

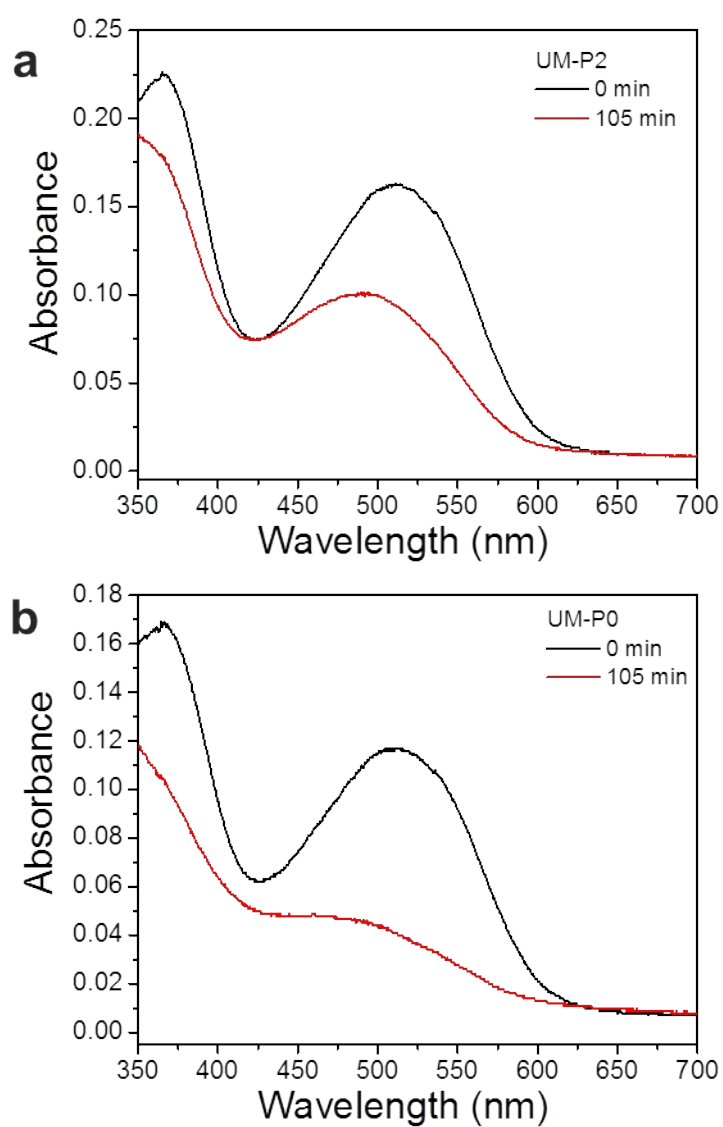

**Figure S4.** (a) Absorption spectra of UM-P2 for different irradiation time using LED light; (b) absorption spectra of UM-P0 for different irradiation times using white LED light.

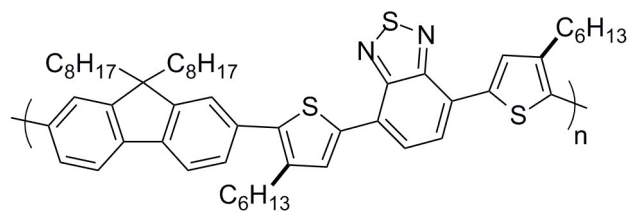

**Figure S5.** Chemical structure of PFTB reported in our previous work.<sup>1</sup>

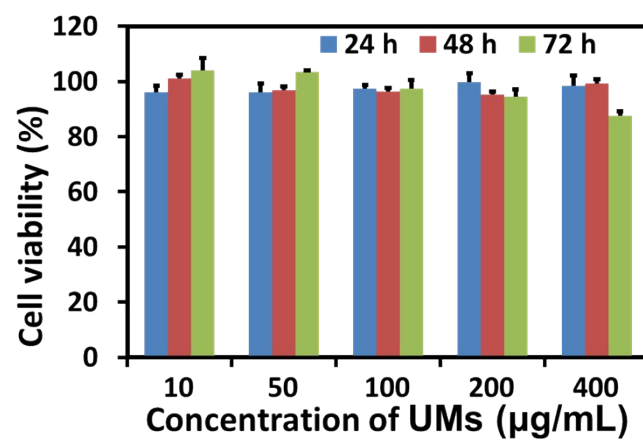

**Figure S6.** Metabolic viability of L929 cancer cells after incubation with UM-P1 at different concentrations for 24, 48 and 72 h, respectively.

**Table S3** Loading content (LC) and encapsulation efficiency (EE) of UM-P1, UM-P2 and

UM-P4

| Sample | UM-P1 | UM-P2 | UM-P4 |
|--------|-------|-------|-------|
| LC (%) | 7.3   | 9.9   | 9.5   |
| EE (%) | 44.6  | 55.3  | 59.7  |

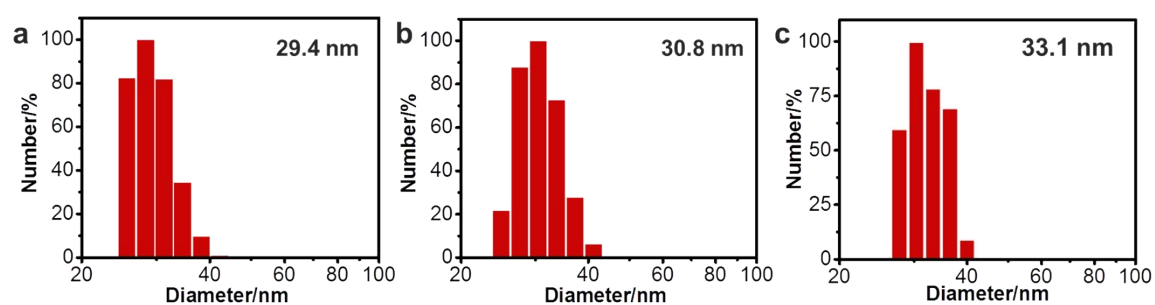

**Figure S7.** DLS results of DOX@UMs in aqueous media: (a) DOX@UM-P1, (b) DOX@UM-P2, (c) DOX@UM-P4.

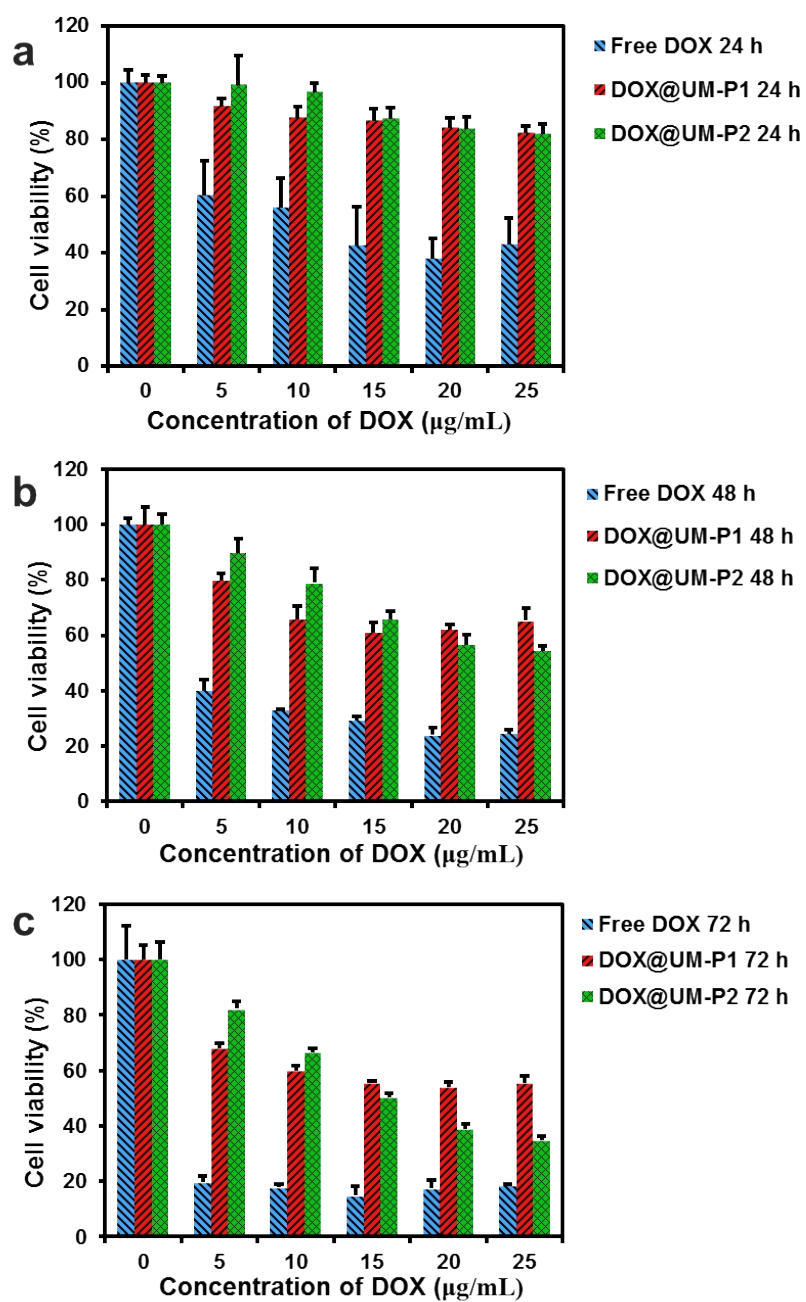

**Figure S8.** Viability of L929 cells incubated for 24 h (a), 48 h (b) and 72 h (c) with free DOX, DOX@UM-P1 and DOX@UM-P2 in aqueous solution at various DOX concentrations.

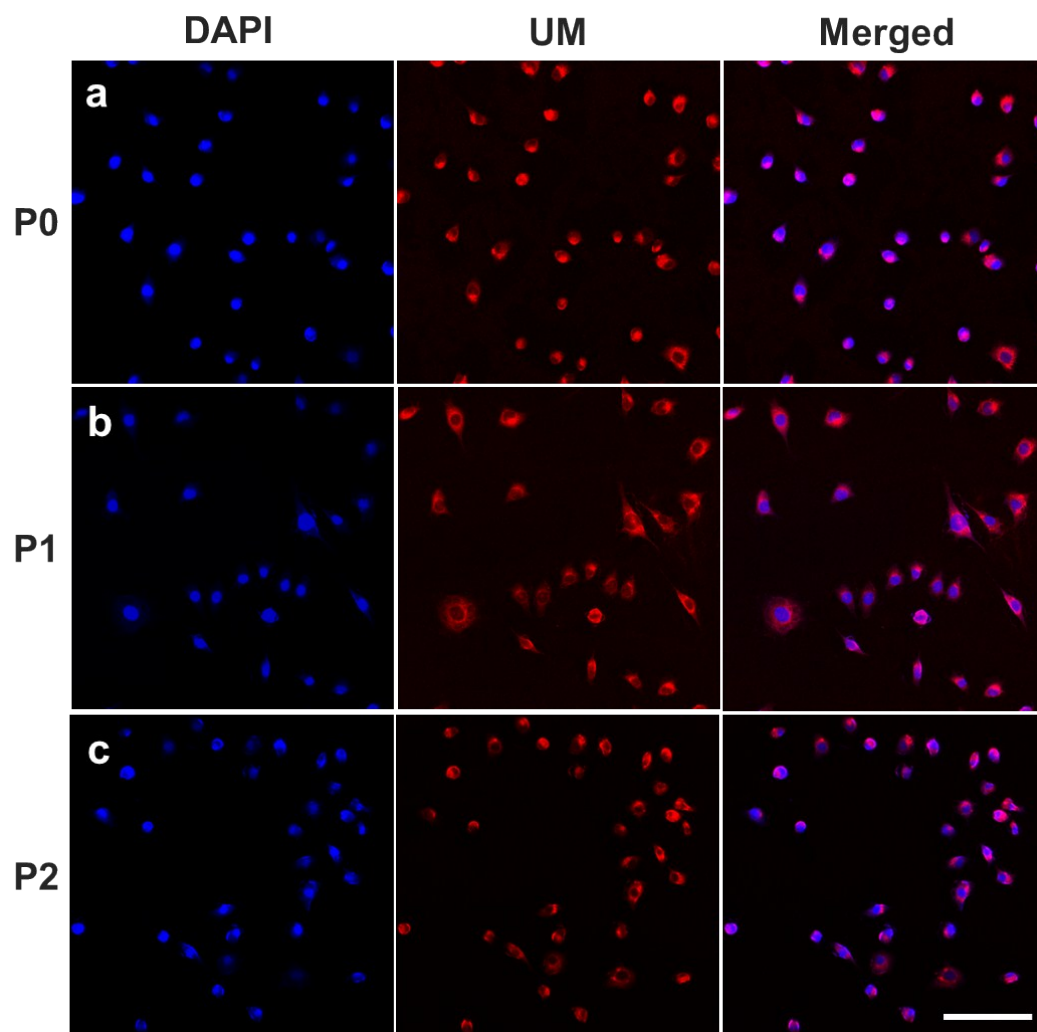

**Figure S9.** Confocal fluorescence microscope images of L929 cells stained with (a) UM-P0, (b) UM-P1, (c) UM-P2. The concentration of UMs is 50  $\mu\text{g/mL}$ . The fluorescence of DAPI and UMs is pseudo-labeled with blue and red, respectively. The scale bar represents 100  $\mu\text{m}$ .

#### Reference

1. X. Wang, K. Wang and M. Wang, *Polym. Chem.*, 2015, **6**, 1846-1855.
